# Supplementary material for: EIN3 and SOS2 synergistically modulate plant salt tolerance
Source: PubMed Central journal article supplement (PMC5353744; doi:10.1038/srep44637), 2017-03-16
Supplement: srep44637-s1.pdf [file srep44637-s1.pdf]

1 **Supplementary Information**

2 **EIN3 and SOS2 synergistically modulate plant salt**  
3 **tolerance**

4 Ruidang Quan<sup>1, 2</sup>, Juan Wang<sup>1, 2</sup>, Dexin Yang<sup>1, 2</sup>, Haiwen Zhang<sup>1, 2</sup>, Zhijin Zhang<sup>1, 2</sup> &  
5 Rongfeng Huang<sup>1, 2,\*</sup>

6 <sup>1</sup>Biotechnology Research Institute, Chinese Academy of Agricultural Sciences, 12  
7 Zhongguancun South Road, Beijing 100081, China.

8 <sup>2</sup>National Key Facility of Crop Gene Resources and Genetic Improvement, 12 Zhong-  
9 guancun South Road, Beijing 100081, China

10 Correspondence and requests for materials should be addressed to R.H. (email:  
11 rfhuang@caas.cn)

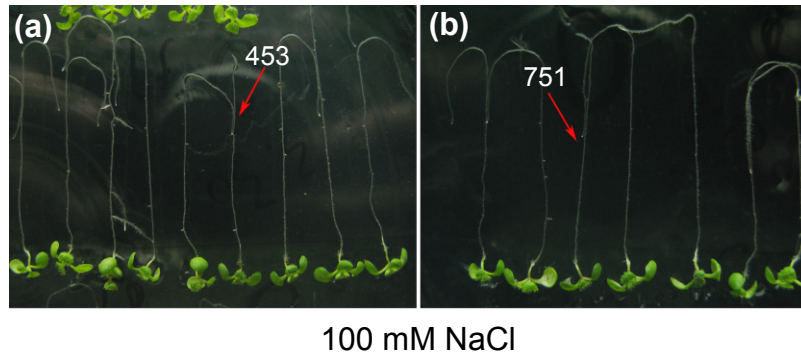

**Supplementary Figure S1.** Screening for salt sensitive mutants in *ein3-1* background.

12 (a, b) M2 seeds of EMS-mutagenized *ein3-1* were germinated on MS media and 4-  
13 day seedlings were transferred to MS media containing 100 mM NaCl. Salt sensitive  
14 mutants were characterized by growth retardation in shoots and/or roots of *ein3-1*  
15 seedlings. 453 (a) and 751 (b) were two putative salt sensitive mutants in *ein3-1* back-  
16 ground.

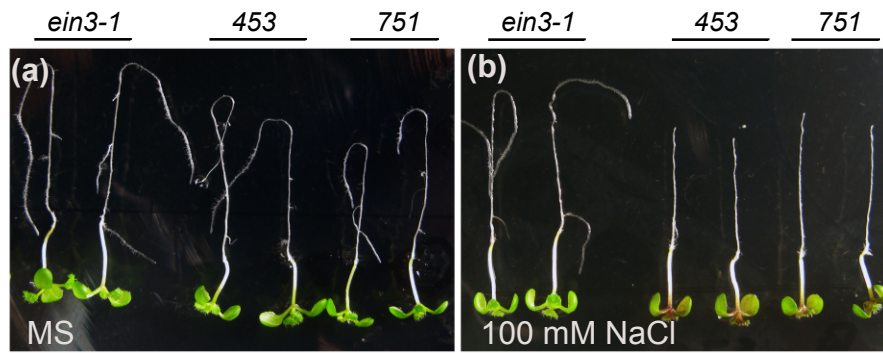

**Supplementary Figure S2.** Both mutants 453 and 751 are more sensitive to salt stress than *ein3-1*.

17 Seeds were germinated on MS media and 4-day seedlings were transferred to MS  
18 media containing 0 (a) and 100 mM NaCl (b), and photos were taken after cultivation  
19 for 4 days.

```

EIN3      1 -MMEFN-EMGCMCGNMDFFSSGSLGVEVDFCPVQAEFDSIVED-DYTDDEIDVDELELRMMWRDKMRLKRLKEQD-KGKEGVDAAKORQS-----OEQA
EIL1     1 MMEFN-EMGMYGNMDFSSSTSS--LDVCPLEPQAEQEPVVDVYTDDEMDVDELELRMMWRDKMRLKRLKEQDQSKCKEAGVDSKORQS-----OEQA
EIL2     1 MDMVNNNIEMFRSLVCSAPPTFGHMC---SDSHTALCDDLSSDEEMEIELEKKTWRDKQRLKRLKEMANGLGTRLLKQOHDD-----FPBHS
EIL3     1 -----MCDLAMSVAIDIRMEENEPD---DLASDNVAEIDVSDDEIDADDLELRMMWRDVRRLKRLKEROQKAGSOGAQT-KETPKK-----ISDQA
EIL4     1 -----MVEVQDLEPLSLQDYDED---DLEEDVDDEFERFGEIISYDILKRRMWDRNLMCKLQOKRDNLNLSVSSPSSSTASSSSSSVIVRRTBAS
EIL5     1 -----MVEVEELEPLSPMDDEE-----EISYDILKRRMWDRNLMCKLQOKRHSNDVVS-----FTTHRAS
consensus 1 mfn mgmmg mdm s spl e d c e d ved d tdeEidvdeLerrmWrDk rikrlkeqqkkg qgvlt kq s eq
          *

EIN3      88 RRRKMSRAQDGILKYMLKMEVCKAQQFVYGIIPENKGPVTGASDNLREWWDKVRFDRNGPAATIKYO--AENNIIPG-IHEGNNPIGPTPHTLQELQDITLGLS
EIL1     89 RRRKMSRAQDGILKYMLKMEVCKAQQFVYGIIPKKGKPVTEASDNLREWWDKVRFDRNGPAATAKYQ--SENNISGGSNDCNLSVGPPTPHTLQELQDITLGLS
EIL2     90 SKRTMYKAQDGILKYMLKMEVCKAQQFVYGIIPENKGTAVAGSSDNLREWWDKVRFDRNGPAATIKHO--RDINLSGSDSGSEVGDSTAQKLELQDITLGLS
EIL3     91 QRRKMSRAQDGILKYMLKMEVCKVRFVYGIIPKKGKPVSGSSDNLRAWWKKEKVEDKNGPAATAKYE--ECLAFCKSDGNRN---SQFVLDLQDITLGLS
EIL4     92 RRRKMARSQDSSLKYMLKMEVCKAQQFVYGIIPKKGKPVTSSSDNLRRWWKENVQEDQAPNVDVDTLALAAAAAELIDKSSSSSLLHMLQELQDITLGLS
EIL5     62 RRRKMARSQDSSLKYMLKMEVCKAQQFVYGIIPKKGKPVTSSSDNLRRWWKENVQEDQAPNVDVDTLALAAAAAELIDKSSSSSLLHMLQELQDITLGLS
consensus 106 rrkMsraQdgiLKYMLkMevCkaQqFvYGiIpEkGkpvtGsSdnlRwwWdkVrFdrngPaAitkyq ae ni g s e s st hvLqelQdITLGLS

EIN3      190 LSALMqHCdPPQRRFPLEKGVPPWWPNGREDDWWPOLGLPKDQG--PAPYKPKPHDLKKAQVGLTAVIKHMFPTAKIRKLVROSKCLQDKMTAKESATWLAII
EIL1     192 LSALMqHCdPPQRRFPLEKGVPPWWPNGNEEWWPOLGLPNEQG--PPPYKPKPHDLKKAQVGLTAVIKHMSPDIAKIRKLVROSKCLQDKMTAKESATWLAII
EIL2     193 LSALFPFHCPQRRFPLEKGVPPWWPTGREDWWDQLSLVDFRCVPPPYKPKPHDLKKAQVGLTAVIKHMSDINSIPNLVRRSRSLQDKMTAKESATWLAII
EIL3     178 LSSLMqHCdPPQRRFPLEKGVPPWWPTGNEEWWVKLGLKKSQS--PPYKPKPHDLKKAQVGLTAVIKHMSDIAKIRKLVROSKCLQDKMTAKESATWLAII
EIL4     195 LSALMqHCdPPQRRFPLEKGLAPPWWPTGREDWWDQLSLVDFRCVPPPYKPKPHDLKKAQVGLTAVIKHMSDINSIPNLVRRSRSLQDKMTAKESATWLAII
EIL5     167 LSALMqHCdPPQRRFPLEKGLAPPWWPTGTELLWNGEQG-AAHEHG-APPYKPKPHDLKKAQVGLTAVIKHMSDIAKIRKLVROSKCLQDKMTAKESATWLAII
consensus 211 LSALmqHCdPPQRRfPLEKGV PPWWP G EdWW qlgp dqrq ppPykKPHDLkKaQvGlTavIkHmspdiaKirrLvRqSkcLQDKMtakeSatwLavl

EIN3      293 NOEESLAREIYPES-----CPLISLSG--GSCSLLMNDCSQYDVEGFKEKESH-YEVEELKPEKVMNS--SNFCMVAKMHDFFVKEEVP-AGNSBFMRKRKP---
EIL1     295 NOEEVVAREIYPES-----CPLISSSSSLGSGSLINDCSEYDVEGFKEKESH-YEVEELKPEKVMNS--SNFCMVAKMHDFFVKEEVP-AGNSBFMRKRKP---
EIL2     298 YREKAIIVDQIA-----MSREN--NNTSNFLVPATGGDFDVLFPESDIDYDVELIG--GTHRTNQQVE-----EFENNYNCVYKRFK---
EIL3     280 NOEESLIQOESSDNGNSNVTETHRRGNADRRKPVVNSDSDYDVEGFKEKESH-YEVEELKPEKVMNS--SNFCMVAKMHDFFVKEEVP-AGNSBFMRKRKP---
EIL4     299 NOEEARLNRIKISD---DDEDRDQEQARFTCFDQEPSSLNRCVFIYVQDQEPPLGSMRDKRVQDQEFSSNDCLFLVADQEPKKGKADQEWSPNCSFLVDQEPFG
EIL5     270 NOEEALNRIKDLKI---SDQD-----DQESSGSKRK-----SESMEPSK-----
consensus 316 nqEealvq l e e lsr n g s lmnd s ydveg e e ye eerk g vak qdfpv v n e rkrk
          *

EIN3      383 NRDLN-TIMDRTV---ETCENLGCASHSETSRGFLDRNSRDNHQLACPHRDSRLPYGAAPSRFVHNEVKPVVGFPPRPVNSVAQPIDLTCI-VPEDGQKMTS--
EIL1     390 NNDNMVMVDRSAG---YTCENGCQPHSKMNLGFQDRSRRDNRQMTCPYRDNRLAYGAS--KFHMGGMKLVVQPQ-VPEDIDLSGVGVPENGQKMTS--
EIL2     369 EEDFG-MPHPTL---ITCENSLCPSQPHMGFLDRNLRNENQMTCPYK---VTSFYQP-----TKFYGMGLMVPCCDYNMGQ--
EIL3     370 PRIRSGTVNRQEEEQPEAQORNILPDMNHVDAPLEYNINGTQEDDVPDPNIALGPED-----NGLELVVPEFNN---NYTYLVLVNEQTMMPVDERPMLYGP
EIL4     399 NKRKGEFVKEEAMLSNVYTCNSSCPSDVSLSGVDKRLRTGHEIECLYGT-----ELVNQSSGGGS-----DGFVRSITSDDDVSSASSKA
EIL5     307 -----SVYTCNSSCPSDVSLSGVDKRLRTGHEIECLYGT-----ELVNQSSGGGS-----DGFVRSITSDDDVSSASSKA
consensus 421 nrd vmh tv ytcenS cphsevsIgfldrnsrdnHql cpyr n v lvv qp pi ltgi vpeddy mis

EIN3      480 --ELMSMYDRNVQSNQTS-MVMENQSVSLLQPTVHNHQEHLEQFPGNMVEGSFFEDLNIPNRANNNSSNQTFQGNNNNNNVKFDTADHNNFEAAHNNNNSS
EIL1     481 --ELMAMYDRNVQSNQTPPTLMENQSMVIDAKAAQNOQLNFN-----SGNQEMMQG-----TNNCV
EIL2     441 --QQVQSFQDF-----NHENDLYRKPAPOR-----GNDDLVEDLNP-----SPSTL
EIL3     466 NPNQELQEGSGYNFYNSAVFVHNOEDDILHTQIEEMNTQAPP-----HNSGFEAPRG-----VLQPLGL
EIL4     482 EDTR-DVHNQDGNWLDYLFWERLHDLNFSQDQFDD-----HNSGFEAPRG-----TST-V
EIL5     381 LDKRDDDHSINGNMEYFWEKMQQEFHCSRREDD-----HNSGFEAPRG-----EGTGT
consensus 526 m y n q yq vmhnq v l enq n f t sgv

EIN3      582 GNRQLVFDSIPFDMAAFDYRDDMSMPGVVGT--MDGMQKQDDVSTLWF-
EIL1     536 NNRQMVFDSTIPFDMAAFDYRDDDWQTGAMGGMGKQQQQQQQQQDDVSTLWF-
EIL2     481 NQNLGLVLPD-----DFNGGEEVTGTENN--LHNQGOELPSTSWLQ--
EIL3     526 LGNEQGVTS-----ELPQVQSGILSPLTDLDFYGGFQDFDVSFQ--
EIL4     521 DLNQLPD-----HSDSNQTMNDLISLWDMCEEDKDIYMSQD
EIL5     423 DFDQLETSDRSNDVNLNQLTKSDRSNDVNRSAFVWDMCEEDKDIYMFED-
consensus 631 nn lv dst dyrsd t e m mgqe dvwiw

```

Supplementary Figure S3. Sequence alignments of EIN3/EIL proteins in *Arabidopsis*.

20 EIN3/EIL protein sequences were aligned by CLUSTAL 2.0.12 and the output was  
21 printed out with BoxShade (<http://www.ch.embnet.org/software/BOX%5Fform.html>).  
22 EIN3 phosphorylation sites were marked with the amino acid position numbers, and  
23 the conserved EIN3 phosphorylation sites by SOS2 in vitro are marked with stars below.

(b)

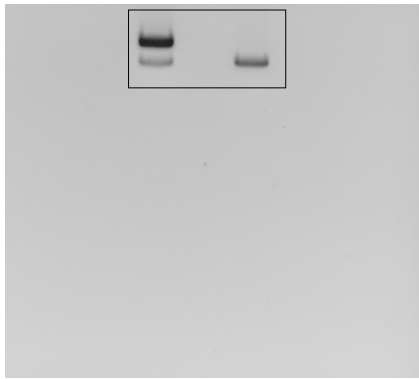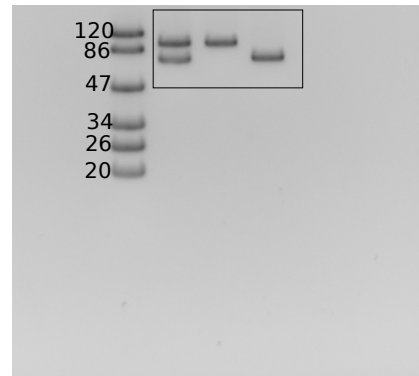

(c)

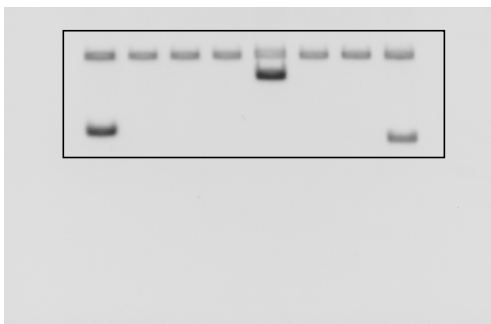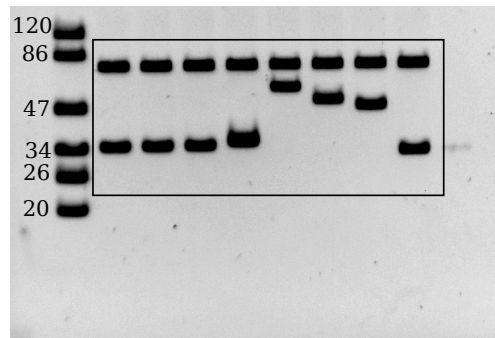

(d)

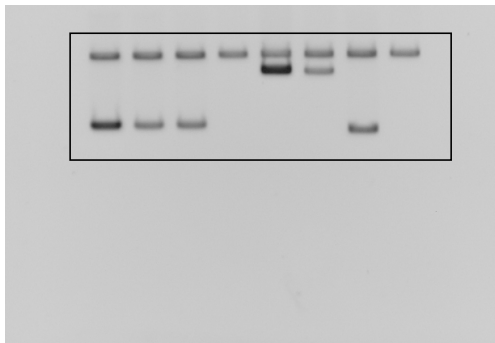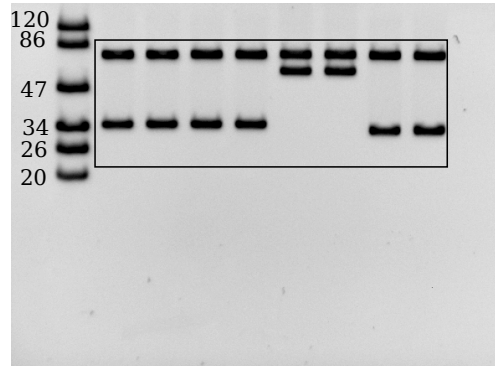

(e)

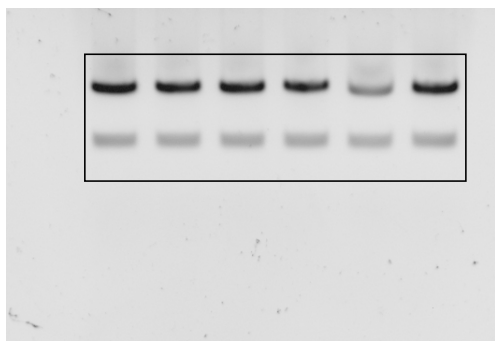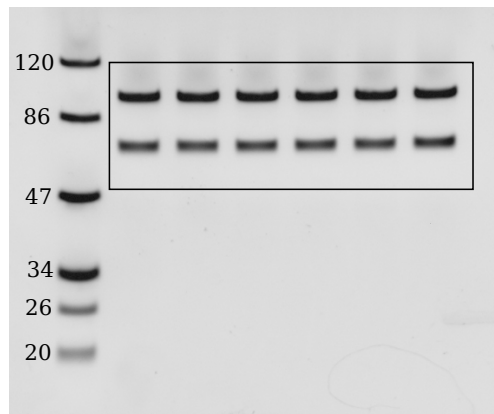

Supplementary Figure S4. Uncropped images of Figure 4.

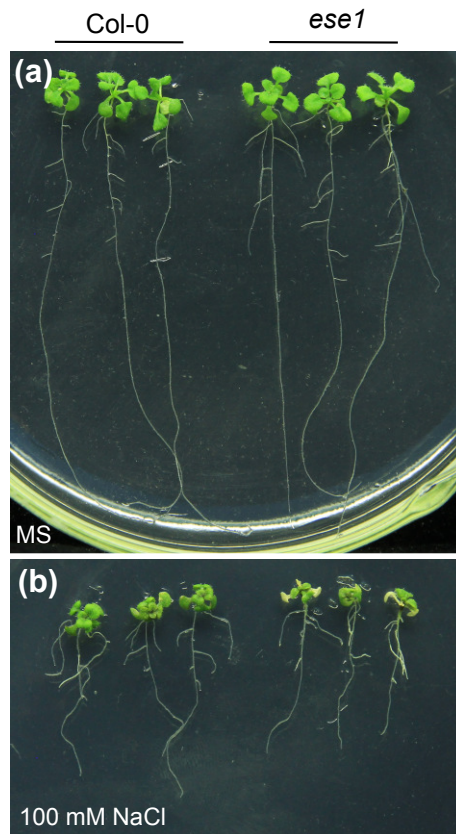

**Supplementary Figure S5.** *ese1* is salt sensitive than wild type plants.

24 Seedling at 4-day stage were transferred to MS medium with 0 (a) and 100 mM  
25 NaCl (b). Ten days after transfer, photos were captured.

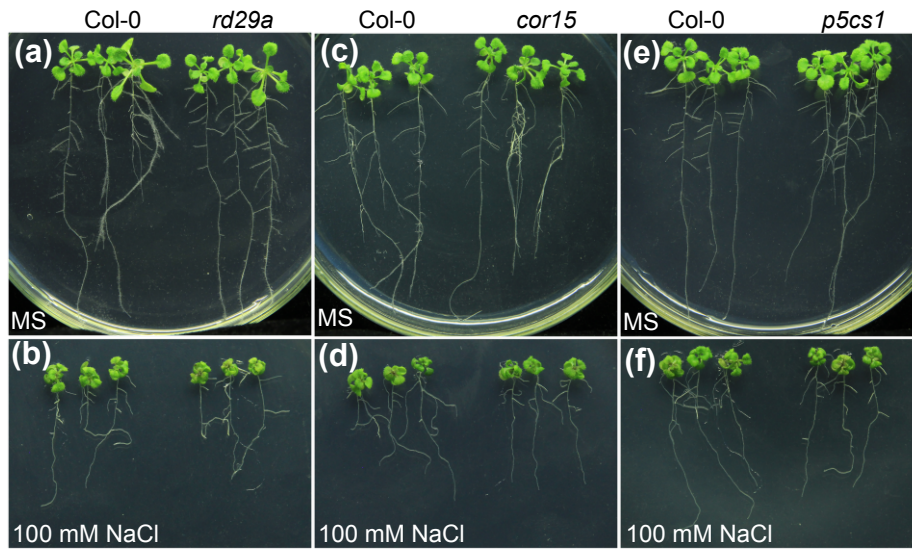

**Supplementary Figure S6.** Salt tolerance analysis of *rd29a*, *cor15* and *p5cs1*.

26 Seedling at 4-day stage were transferred to MS medium with 0 (a, c, e) and 100  
27 mM NaCl (b, d, f). Ten days after transfer, photos were captured.



**Supplementary Table S1.** Primers used in this study.

| Name      | Sequence (5' to 3')      |                        |
|-----------|--------------------------|------------------------|
| ACT2RTF   | GTCGTACAACCGGTATTGTG     | qPCR, internal control |
| ACT2RTR   | GAGCTGGTCTTTGAGGTTTC     | qPCR, internal control |
| UBQ10RTF  | ACCGGAAAGACTATCACTTTG    | qPCR, internal control |
| UBQ10RTR  | AGAGATAACAGGAACGGAAAC    | qPCR, internal control |
| SOS1RTF   | CCGCATTATCACCTTCTAAC     | qPCR                   |
| SOS1RTR   | AGATGGTCTTCGATGTAGAG     | qPCR                   |
| SOS2RTF   | CGAAACTTCAAGACAAGGCTC    | qPCR                   |
| SOS2RTR   | GTGCCACCTCGTAAATCTCTATC  | qPCR                   |
| SOS3RTF   | GTAATGGTGGATAAGGCTTTTCG  | qPCR                   |
| SOS3RTR   | TGAGCGATGGATTCAAGGATAC   | qPCR                   |
| SCaBP8RTF | AACAAATGGTTTCTGCTATTCTC  | qPCR                   |
| SCaBP8RTR | ATCTGCATCAGCAAATGTTTTATC | qPCR                   |
| ESE1RTF   | GGGACGTTTAACACAGCGGAAGAC | qPCR                   |
| ESE1RTR   | GCATTCTCGTGGCTGCCATTTG   | qPCR                   |
| ESE2RTF   | GAAGCCGCTCTTATGGATTTC    | qPCR                   |
| ESE2RTR   | TCGGCAACTCCACAATATCTC    | qPCR                   |
| ERF1RTF   | CGGATCTTCTCCAGATTCTTTC   | qPCR                   |
| ERF1RTR   | CTCTGACTTTCTTGAGCTTACG   | qPCR                   |
| ERF3RTF   | GCCATTCCTACTTCCTCTTC     | qPCR                   |
| ERF3RTR   | TCTCCGTTACTCCTCTGTTC     | qPCR                   |

**Supplementary Table S1.** Primers used in this study.

| Name         | Sequence (5' to 3')             |                    |
|--------------|---------------------------------|--------------------|
| ERF5RTF      | GAAAGTGTTGAAGACGGAACAG          | qPCR               |
| ERF5RTR      | GAATAACCAAACGGTGGATGAG          | qPCR               |
| ERF9RTF      | ATGTCACCGGGAGCGTAAAG            | qPCR               |
| ERF9RTR      | CAAACCGAACCGGACAAACC            | qPCR               |
| ERF12RTF     | TACTTCATCAGCCGTCTCGTCAC         | qPCR               |
| ERF12RTR     | CTCCAAAGCGGAATGTCAGCATC         | qPCR               |
| ERF14RTF     | AAGTCTCCTTGTCTGAATC             | qPCR               |
| ERF14RTR     | CAGCAGAAGTTCCATAATC             | qPCR               |
| ERF42RTF     | GAAGCCGCTCTTATGGATTTC           | qPCR               |
| ERF42RTR     | TCGGCAACTCCACAATATCTC           | qPCR               |
| EIN2CRTF     | ACTGTGGAGATGGTTGCGTTTG          | qPCR               |
| EIN2CRTR     | AAAGCACGGTGTCAATTGGTGTC         | qPCR               |
| EIN3RTF      | TAACAGTAGCGGCAACAGGTTTC         | qPCR               |
| EIN3RTR      | TCTTGCTGCTTCTGCTGCATTC          | qPCR               |
| GST-EIN3F    | CGGGATCCATGATGTTTAATGAGATGGG    | GST fusion protein |
| GST-EIN3R    | GCGTCGACTTAGAACCATATGGATAACATC  | GST fusion protein |
| EIN3-1-70F   | CGGGATCCATGATGTTTAATGAGATGGG    | EIN3 fragment      |
| EIN3-1-70R   | GCGTCGACCTACTTATCCTGCTCCTTGAGAC | EIN3 fragment      |
| EIN3-71-141F | CGGGATCCGGTAAAGAAGGTGTTGATGC    | EIN3 fragment      |
| EIN3-71-141R | GCGTCGACCTACTTATCTTTCCACCACTCCC | EIN3 fragment      |

**Supplementary Table S1.** Primers used in this study.

| Name          | Sequence (5' to 3')                  |                     |
|---------------|--------------------------------------|---------------------|
| EIN3-142-220F | CGGGATCCGTTAGGTTTGATCGTAATGG         | EIN3 fragment       |
| EIN3-142-220R | GCGTCGACCTACTCTTTCCATTAGGCCACC       | EIN3 fragment       |
| EIN3-221-314F | CGGGATCCGATTGGTGGCCTCAACTTGG         | EIN3 fragment       |
| EIN3-221-314R | GCGTCGACCTAACCAGACAGAGAAAGAGGTG      | EIN3 fragment       |
| EIN3-315-628F | CGGGATCCGGAAGTTGCTCGCTTCTGATG        | EIN3 fragment       |
| EIN3-315-628R | GCGTCGACTTAGAACCATATGGATACATC        | EIN3 fragment       |
| EIN3-326-538F | CGGGATCCCAATACGATGTTGAAGTTTC         | EIN3 fragment       |
| EIN3-326-538R | GCGTCGACCTATGCTCTGTTTGGGATGTTCAAG    | EIN3 fragment       |
| EIN3-430-605F | CGGGATCCCGCTTACCGTATGGAGCAGC         | EIN3 fragment       |
| EIN3-430-605R | GCGTCGACTCACATATCATCTCTGTAATCGAATG   | EIN3 fragment       |
| EIN3-593-628F | CGGGATCCCCGTTTCGACATGGCGTCATTC       | EIN3 fragment       |
| EIN3-593-628R | GCGTCGACTTAGAACCATATGGATACATC        | EIN3 fragment       |
| EIN3-S606AF   | TTACAGAGATGATATGGCGATGCCAGGAGTAG     | EIN3 point mutation |
| EIN3-S606AR   | CTACTCCTGGCATCGCCATATCATCTCTGTAA     | EIN3 point mutation |
| EIN3-S35AF    | TCCACAAGCTGAGCCTGATGCCATTGTTGAAGATG  | EIN3 point mutation |
| EIN3-S35AR    | CATCTTCAACAATGGCATCAGGCTCAGCTTGTGG   | EIN3 point mutation |
| EIN3-T42AF    | GAAGATGACTATGCTGATGATGAGATTGATGTTG   | EIN3 point mutation |
| EIN3-T42AR    | CAATCTCATCATCAGCATAGTCATCTTCAACAATGG | EIN3 point mutation |
| EIN3-S325AF   | TGATGAATGATTGCGCTCAATACGATGTTGAA     | EIN3 point mutation |
| EIN3-S325AR   | TTCAACATCGTATTGAGCGCAATCATTCATCA     | EIN3 point mutation |
